# Supplementary material for: Association of ambient particulate matter with heart failure incidence and all-cause readmissions in Tasmania: an observational study
Source: PubMed Central journal article supplement — BMJ Open. 2018 May 10;8(5):e021798. doi: 10.1136/bmjopen-2018-021798 (PMC5950647; doi:10.1136/bmjopen-2018-021798), 2018-05-10
Supplement: bmjopen-2018-021798supp001.pdf [file bmjopen-2018-021798supp001.pdf]

**Supplementary Table 1:** Univariable Poisson regression of environmental factors with heart failure specific readmission

|                                              | Heart failure specific readmission |        |
|----------------------------------------------|------------------------------------|--------|
|                                              | Risk ratio                         | p      |
| PM <sub>2.5</sub> (per 10µg/m <sup>3</sup> ) |                                    |        |
| Lag <sub>0</sub> day                         | 0.94 (0.80, 1.11)                  | 0.49   |
| Lag <sub>1</sub> day                         | 1.03 (0.88, 1.21)                  | 0.66   |
| Lag <sub>2</sub> day                         | 0.98 (0.83, 1.16)                  | 0.83   |
| Lag <sub>3</sub> day                         | 0.97 (0.82, 1.14)                  | 0.67   |
| Lag <sub>4</sub> day                         | 1.01 (0.86, 1.19)                  | 0.90   |
| Lag <sub>5</sub> day                         | 1.02 (0.87, 1.20)                  | 0.82   |
| Lag <sub>1-3</sub> day average               | 1.00 (0.83, 1.20)                  | 0.98   |
| Temperature (per 10°C)                       |                                    |        |
| Lag <sub>0</sub> day                         | 0.77 (0.62, 0.95)                  | 0.016  |
| Lag <sub>1</sub> day                         | 0.87 (0.70, 1.08)                  | 0.20   |
| Lag <sub>2</sub> day                         | 0.75 (0.61, 0.94)                  | 0.012  |
| Lag <sub>3</sub> day                         | 0.61 (0.49, 0.77)                  | <0.001 |
| Lag <sub>4</sub> day                         | 0.69 (0.55, 0.86)                  | 0.001  |
| Lag <sub>5</sub> day                         | 0.79 (0.64, 0.97)                  | 0.029  |
| Lag <sub>1-3</sub> day average               | 0.68 (0.53, 0.87)                  | 0.002  |
| Relative humidity (per 10%)                  |                                    |        |
| Lag <sub>0</sub> day                         | 1.15 (1.06, 1.25)                  | 0.001  |
| Lag <sub>1</sub> day                         | 1.21 (1.11, 1.31)                  | <0.001 |
| Lag <sub>2</sub> day                         | 1.23 (1.13, 1.34)                  | <0.001 |
| Lag <sub>3</sub> day                         | 1.28 (1.18, 1.39)                  | <0.001 |
| Lag <sub>4</sub> day                         | 1.16 (1.07, 1.26)                  | <0.001 |
| Lag <sub>5</sub> day                         | 1.28 (1.17, 1.39)                  | <0.001 |
| Lag <sub>1-3</sub> day average               | 1.41 (1.27, 1.57)                  | <0.001 |

**Supplementary Table 2:** Comparison between patients who used beta-blockers and those who did not use beta-blockers

|                                        | No beta-blockers | Used beta-blockers | p     |
|----------------------------------------|------------------|--------------------|-------|
| Age at first admission (years)         | 79±12            | 75±12              | 0.001 |
| Mean NYHA class                        | 2.5±1.0          | 2.3±0.9            | 0.001 |
| Charlson comorbidity index             | 8.6±2.5          | 7.9±2.6            | 0.001 |
| Length of first hospital stay (days)   | 6.3±7.3          | 5.8±5.9            | 0.19  |
| Heart rate (bpm)                       | 81±16            | 78±15              | 0.001 |
| Respiratory rate (respirations/minute) | 19.5±4.5         | 19.0±3.8           | 0.029 |
| HFpEF*                                 | 38% (74/197)     | 44% (112/254)      | 0.16  |
| Living alone                           | 49% (397/812)    | 45% (411/915)      | 0.19  |
| Distance from home to                  |                  |                    |       |
| The closest clinic (km)                | 0.30±0.60        | 0.34±0.76          | 0.35  |
| The closest pharmacy (km)              | 0.28±0.51        | 0.35±0.71          | 0.055 |

Abbreviation: NYHA (New York Heart Association Classification of heart failure), HFpEF (heart failure with preserved ejection fraction,  $\geq 40\%$ ).

\*Data available for 451 patients only.

**Supplementary Table 3:** Comparison between patients who used ACEi/ARB and those who did not use ACEi/ARB

|                                        | No ACEi/ARB   | Used ACEi/ARB  | p      |
|----------------------------------------|---------------|----------------|--------|
| Age at first admission (years)         | 79±12         | 76±12          | 0.002  |
| Mean NYHA class                        | 2.6±1.0       | 2.3±0.9        | <0.001 |
| Charlson comorbidity index             | 8.8±2.6       | 8.0±2.5        | <0.001 |
| Length of first hospital stay (days)   | 6.4±7.3       | 5.9±6.3        | 0.28   |
| Heart rate (bpm)                       | 82±17         | 79±15          | 0.007  |
| Respiratory rate (respirations/minute) | 19.8±3.4      | 19.0±4.4       | 0.013  |
| HFpEF*                                 | 36% (44/121)  | 44% (144/330)  | 0.092  |
| Living alone                           | 52% (243/467) | 43% (542/1260) | 0.011  |
| Distance from home to                  |               |                |        |
| The closest clinic (km)                | 0.29±0.56     | 0.34±0.65      | 0.26   |
| The closest pharmacy (km)              | 0.33±0.69     | 0.33±0.69      | 0.97   |

Abbreviation: NYHA (New York Heart Association Classification of heart failure), HFpEF (heart failure with preserved ejection fraction,  $\geq 40\%$ ).

\*Data available for 451 patients only.

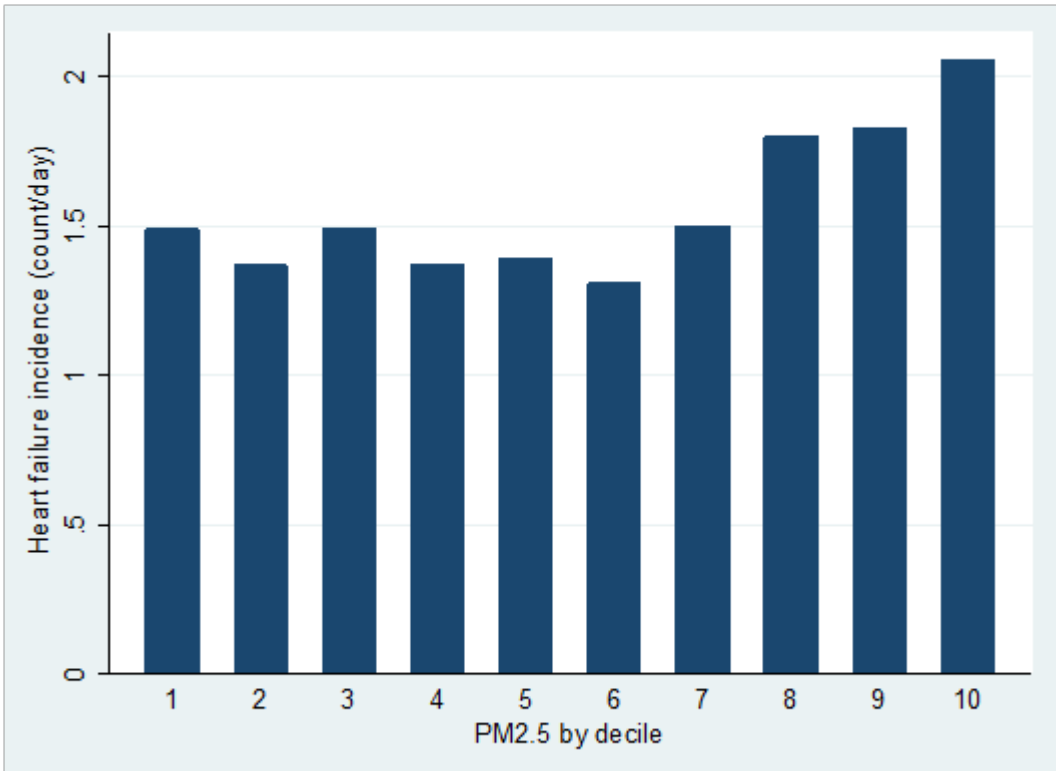

**Supplementary Figure 1.** The association of PM<sub>2.5</sub> with heart failure incidence
